# Supplementary material for: A first-principles study of 2D single-layer SiP as anode materials for lithium-ion batteries and sodium-ion batteries
Source: Royal Society of Chemistry journal article supplement (doi:10.1039/d3cp05164a), 2024-01-01
Supplement: d3cp05164a1.pdf [file d3cp05164a1.pdf]

## Supporting Information

### **A First Principle Study of 2D Single-layer SiP as Anode Material for Lithium-ion Battery and Sodium-ion Battery**

Yingying Xing <sup>a</sup>, Chihao Cao <sup>a</sup>, Zhong Huang <sup>a</sup>, Liang Huang <sup>\*, a</sup>, Haijun Zhang <sup>\*, a</sup>,

Quanli Jia <sup>b</sup>

<sup>a</sup> *The State Key Laboratory of Refractories and Metallurgy, School of Materials and Metallurgy, Wuhan University of Science and Technology, Wuhan 430081, China*

<sup>b</sup> *Henan Key Laboratory of High Temperature Functional Ceramics, Zhengzhou University, Zhengzhou 450052, China*

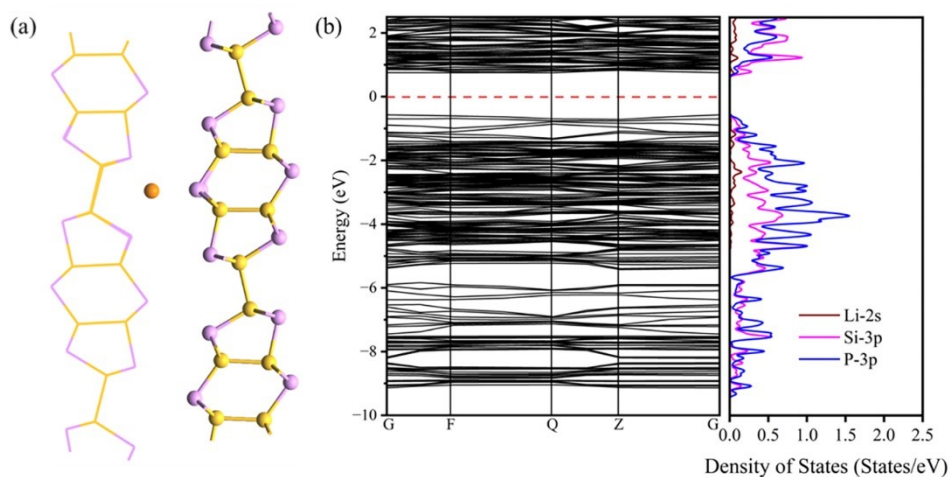

Fig. S1 (a) The optimized structure, (b) the band structure and density of states (DOS) of bulk SiP when Li is intercalated at site 2. The yellow, orange, and purple balls denote Si atoms, Li atoms, and P atoms, respectively.

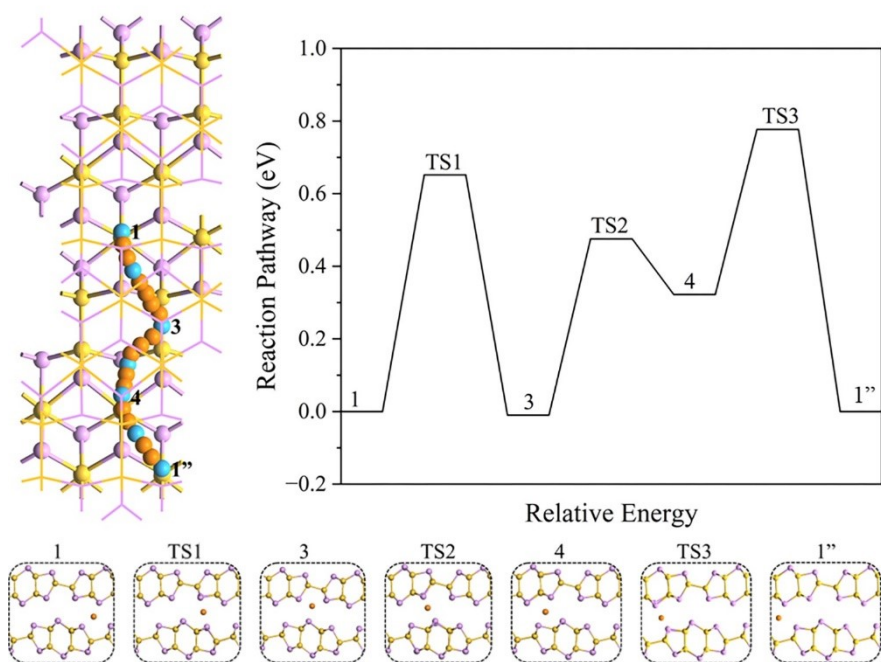

Fig. S2 The reaction coordinates and energy barriers for path 2 of Li diffusion along Y axis in bulk SiP. The blue ball represents initial state, transition state (TS), intermediate and final state.

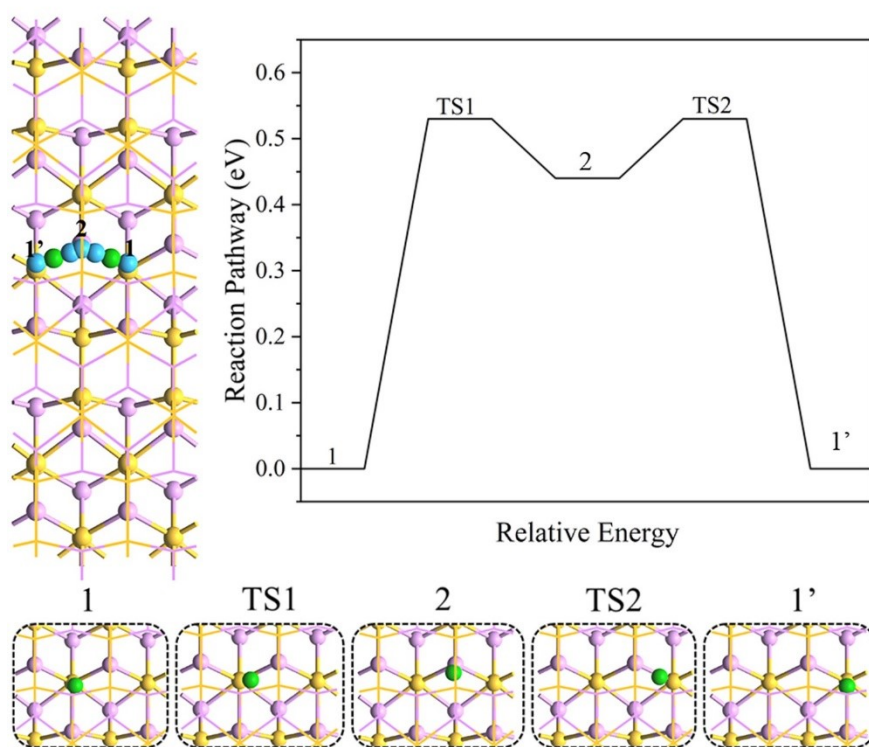

Fig. S3 The reaction coordinates and energy barriers for Na diffusion along the X axis in bulk SiP. The green balls denote Na atoms.

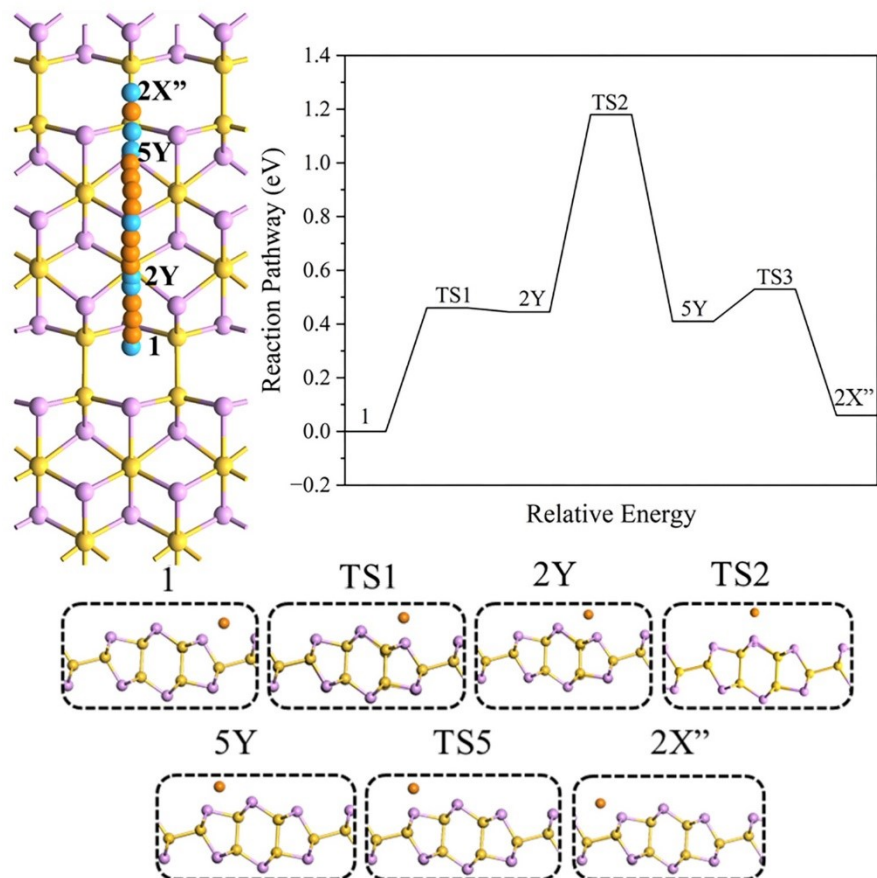

Fig. S4 The reaction coordinates and energy barriers for path 2 of Li diffusion along Y axis on 2D single-layer SiP.

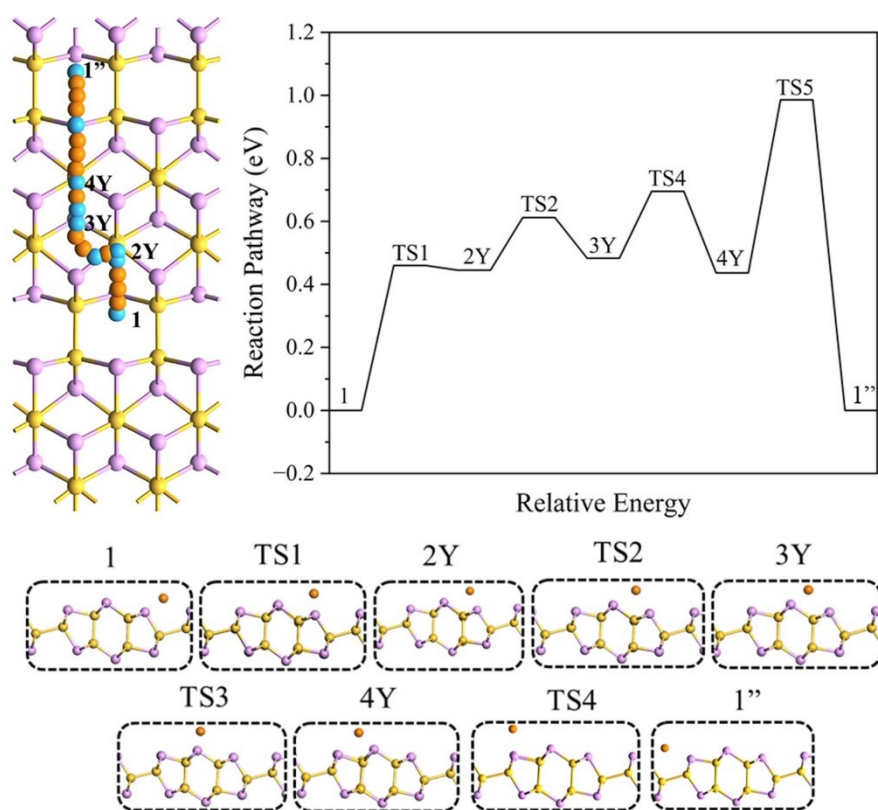

Fig. S5 The reaction coordinates and energy barriers for path 3 of Li diffusion along Y axis on 2D single-layer SiP.

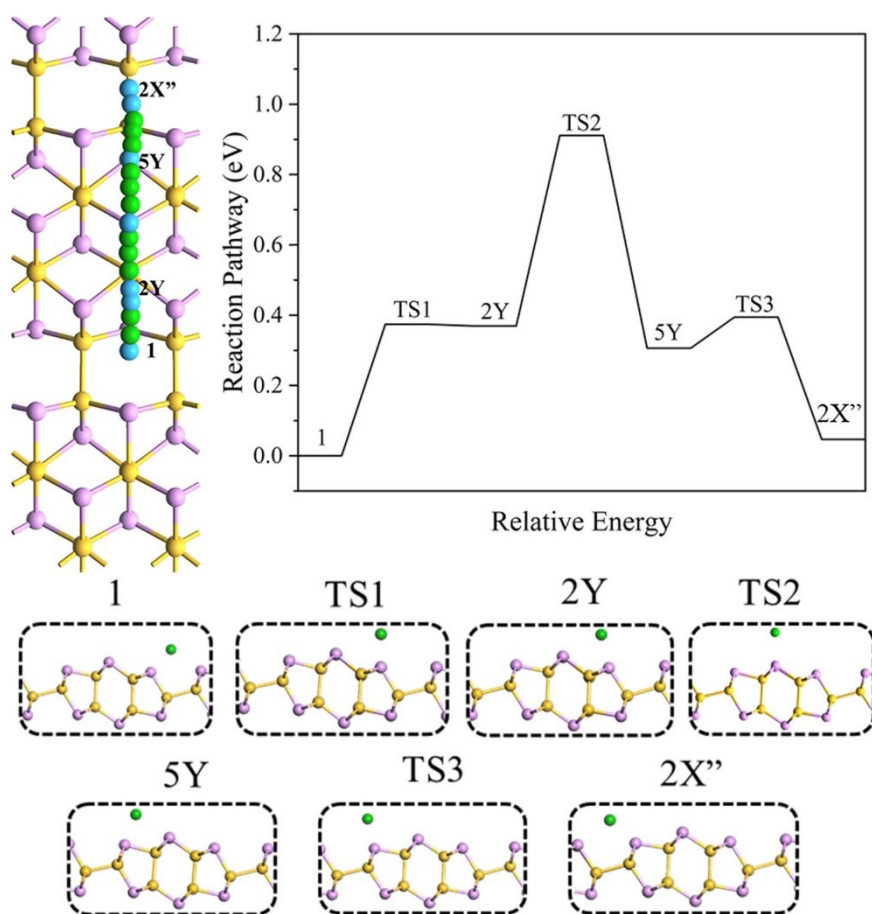

Fig. S6 The reaction coordinates and energy barriers for path 2 of Na diffusion along Y axis on 2D single-layer SiP.

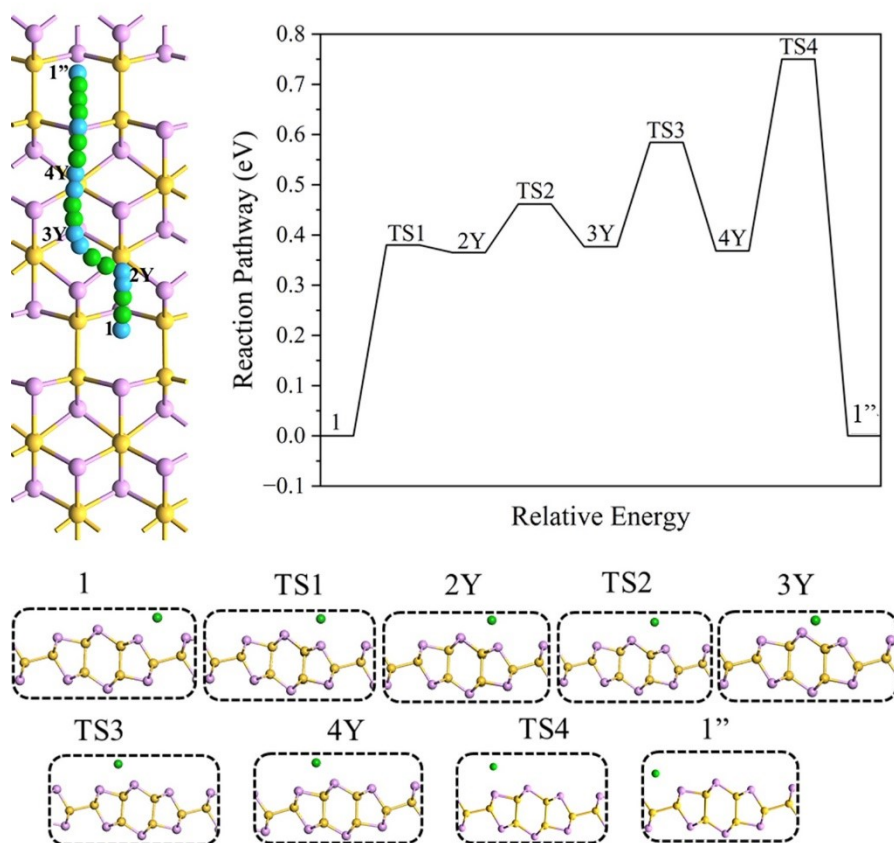

Fig. S7 The reaction coordinates and energy barriers for path 3 of Na diffusion along Y axis on 2D single-layer SiP.

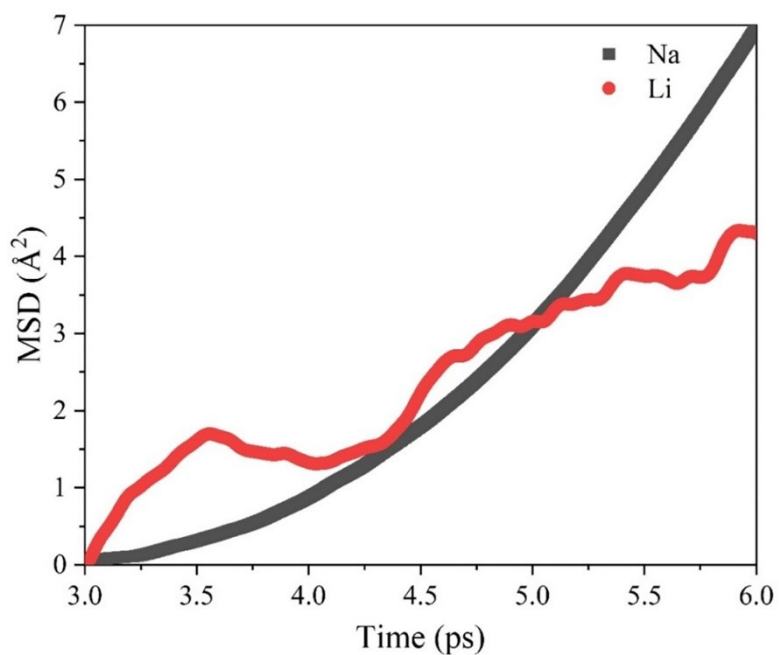

Fig. S8 The mean squared displacement (MSD) of Li or Na atom on 2D Single-layer SiP during MD from 3 to 6 ps at 400 K

Table S1 Adsorption energy of Li/Na on the 2D single-layer SiP or in bulk SiP at different K points

| K-point         | Li on 2D single-layer SiP | Na on 2D single-layer SiP | Li in bulk SiP |
|-----------------|---------------------------|---------------------------|----------------|
| $2\beta 1\beta$ | -1.946 eV                 | -1.392 eV                 | -2.305 eV      |
| 1               |                           |                           |                |
| $6\beta 3\beta$ | -1.857 eV                 | -1.296 eV                 | -2.231 eV      |
| 1               |                           |                           |                |
| $6\beta 3\beta$ | -1.857 eV                 | -1.296 eV                 | -2.190 eV      |
| 2               |                           |                           |                |
| $8\beta 4\beta$ | -1.858 eV                 | -1.295 eV                 | -2.188 eV      |
| 1               |                           |                           |                |
| $8\beta 4\beta$ | \                         | \                         | -2.187 eV      |



Table S2 The diffusion coefficient of Li/Na atom on 2D single-layer SiP

|                                                                             | Li   | Na   |
|-----------------------------------------------------------------------------|------|------|
| Diffusion coefficient ( $\times 10^{-5} \text{ cm}^2 \cdot \text{s}^{-1}$ ) | 2.12 | 5.97 |

Table S3 System energy of 2D single-layer SiP under the vacuum layer of 15 Å and 20 Å.

| Vacuum layer (Å) | 15         | 20         |
|------------------|------------|------------|
| Energy (eV)      | -6896.4836 | -6896.4829 |

Table S4 The lattice parameters of 2D single-layer SiP

| a      | b       | c       | $\alpha$ | $\beta$ | $\gamma$ |
|--------|---------|---------|----------|---------|----------|
| 6.98 Å | 20.56 Å | 19.72 Å | 90°      | 90°     | 90°      |

Table S5 The fractional coordinate of each atom for 2D single-layer SiP

| Element | Atom Number | Fractional coordinates of atoms |          |          |
|---------|-------------|---------------------------------|----------|----------|
|         |             | u                               | v        | w        |
| Si      | 1           | 0                               | 0.170732 | 0.261034 |
| Si      | 2           | 0                               | 0.059857 | 0.220858 |
| Si      | 3           | 0                               | 0.435417 | 0.318389 |
| Si      | 4           | 0                               | 0.432405 | 0.149999 |
| Si      | 5           | 0                               | 0.795446 | 0.165344 |

---

|    |    |      |          |          |
|----|----|------|----------|----------|
| Si | 6  | 0    | 0.798105 | 0.333262 |
| Si | 7  | 0.25 | 0.670732 | 0.261034 |
| Si | 8  | 0.25 | 0.559857 | 0.220858 |
| Si | 9  | 0.25 | 0.935417 | 0.318389 |
| Si | 10 | 0.25 | 0.932405 | 0.149999 |
| Si | 11 | 0.25 | 0.295446 | 0.165344 |
| Si | 12 | 0.25 | 0.298105 | 0.333262 |
| Si | 13 | 0    | 0.829268 | 0.761034 |
| Si | 14 | 0    | 0.940143 | 0.720858 |
| Si | 15 | 0    | 0.564583 | 0.818389 |
| Si | 16 | 0    | 0.567595 | 0.649999 |
| Si | 17 | 0    | 0.204554 | 0.665344 |
| Si | 18 | 0    | 0.201895 | 0.833262 |
| Si | 19 | 0.25 | 0.329268 | 0.761034 |
| Si | 20 | 0.25 | 0.440143 | 0.720858 |
| Si | 21 | 0.25 | 0.064583 | 0.818389 |
| Si | 22 | 0.25 | 0.067595 | 0.649999 |
| Si | 23 | 0.25 | 0.704554 | 0.665344 |
| Si | 24 | 0.25 | 0.701895 | 0.833262 |
| Si | 25 | 0.5  | 0.170732 | 0.261034 |
| Si | 26 | 0.5  | 0.059857 | 0.220858 |
| Si | 27 | 0.5  | 0.435417 | 0.318389 |
| Si | 28 | 0.5  | 0.432405 | 0.149999 |
| Si | 29 | 0.5  | 0.795446 | 0.165344 |
| Si | 30 | 0.5  | 0.798105 | 0.333262 |
| Si | 31 | 0.75 | 0.670732 | 0.261034 |
| Si | 32 | 0.75 | 0.559857 | 0.220858 |
| Si | 33 | 0.75 | 0.935417 | 0.318389 |
| Si | 34 | 0.75 | 0.932405 | 0.149999 |

---

---

|    |    |      |          |          |
|----|----|------|----------|----------|
| Si | 35 | 0.75 | 0.295446 | 0.165344 |
| Si | 36 | 0.75 | 0.298105 | 0.333262 |
| Si | 37 | 0.5  | 0.829268 | 0.761034 |
| Si | 38 | 0.5  | 0.940143 | 0.720858 |
| Si | 39 | 0.5  | 0.564583 | 0.818389 |
| Si | 40 | 0.5  | 0.567595 | 0.649999 |
| Si | 41 | 0.5  | 0.204554 | 0.665344 |
| Si | 42 | 0.5  | 0.201895 | 0.833262 |
| Si | 43 | 0.75 | 0.329268 | 0.761034 |
| Si | 44 | 0.75 | 0.440143 | 0.720858 |
| Si | 45 | 0.75 | 0.064583 | 0.818389 |
| Si | 46 | 0.75 | 0.067595 | 0.649999 |
| Si | 47 | 0.75 | 0.704554 | 0.665344 |
| Si | 48 | 0.75 | 0.701895 | 0.833262 |
| P  | 1  | 0    | 0.000158 | 0.360796 |
| P  | 2  | 0    | 0.231032 | 0.122028 |
| P  | 3  | 0    | 0.344786 | 0.411032 |
| P  | 4  | 0    | 0.540852 | 0.119716 |
| P  | 5  | 0    | 0.689422 | 0.362302 |
| P  | 6  | 0    | 0.885819 | 0.072281 |
| P  | 7  | 0.25 | 0.500158 | 0.360796 |
| P  | 8  | 0.25 | 0.731032 | 0.122028 |
| P  | 9  | 0.25 | 0.844786 | 0.411032 |
| P  | 10 | 0.25 | 0.040852 | 0.119716 |
| P  | 11 | 0.25 | 0.189422 | 0.362302 |
| P  | 12 | 0.25 | 0.385819 | 0.072281 |
| P  | 13 | 0    | 0.999842 | 0.860796 |
| P  | 14 | 0    | 0.768968 | 0.622028 |
| P  | 15 | 0    | 0.655214 | 0.911032 |

---

---

|   |    |      |          |          |
|---|----|------|----------|----------|
| P | 16 | 0    | 0.459148 | 0.619716 |
| P | 17 | 0    | 0.310578 | 0.862302 |
| P | 18 | 0    | 0.114181 | 0.572281 |
| P | 19 | 0.25 | 0.499842 | 0.860796 |
| P | 20 | 0.25 | 0.268968 | 0.622028 |
| P | 21 | 0.25 | 0.155214 | 0.911032 |
| P | 22 | 0.25 | 0.959148 | 0.619716 |
| P | 23 | 0.25 | 0.810578 | 0.862302 |
| P | 24 | 0.25 | 0.614181 | 0.572281 |
| P | 25 | 0.5  | 0.000158 | 0.360796 |
| P | 26 | 0.5  | 0.231032 | 0.122028 |
| P | 27 | 0.5  | 0.344786 | 0.411032 |
| P | 28 | 0.5  | 0.540852 | 0.119716 |
| P | 29 | 0.5  | 0.689422 | 0.362302 |
| P | 30 | 0.5  | 0.885819 | 0.072281 |
| P | 31 | 0.75 | 0.500158 | 0.360796 |
| P | 32 | 0.75 | 0.731032 | 0.122028 |
| P | 33 | 0.75 | 0.844786 | 0.411032 |
| P | 34 | 0.75 | 0.040852 | 0.119716 |
| P | 35 | 0.75 | 0.189422 | 0.362302 |
| P | 36 | 0.75 | 0.385819 | 0.072281 |
| P | 37 | 0.5  | 0.999842 | 0.860796 |
| P | 38 | 0.5  | 0.768968 | 0.622028 |
| P | 39 | 0.5  | 0.655214 | 0.911032 |
| P | 40 | 0.5  | 0.459148 | 0.619716 |
| P | 41 | 0.5  | 0.310578 | 0.862302 |
| P | 42 | 0.5  | 0.114181 | 0.572281 |
| P | 43 | 0.75 | 0.499842 | 0.860796 |
| P | 44 | 0.75 | 0.268968 | 0.622028 |

---

---

|    |    |      |          |          |
|----|----|------|----------|----------|
| P  | 45 | 0.75 | 0.155214 | 0.911032 |
| P  | 46 | 0.75 | 0.959148 | 0.619716 |
| P  | 47 | 0.75 | 0.810578 | 0.862302 |
| P  | 48 | 0.75 | 0.614181 | 0.572281 |
| Si | 1  | 0    | 0.170732 | 0.261034 |
| Si | 2  | 0    | 0.059857 | 0.220858 |

---
